# Supplementary material
Source: PubMed Central journal article supplement (PMC3427406)
Supplement: NIHMS373744-supplement-supplement_1.pdf [file NIHMS373744-supplement-supplement_1.pdf]

Supplementary Table 1: Association between rs1451240 and smoking phenotypes.

|                                | FTCD $\leq$ 3 vs FTCD $\geq$ 4 |      |         | FTCD              |         | CPD               |         |
|--------------------------------|--------------------------------|------|---------|-------------------|---------|-------------------|---------|
|                                | logistic regression            |      |         | linear regression |         | linear regression |         |
|                                | n                              | OR   | p       | $\beta$           | p       | $\beta$           | p       |
| ever-smokers                   | 3,359                          | 0.65 | 2.1E-08 | -0.48             | 4.0E-04 | -0.08             | 4.0E-04 |
| smoked $\geq$ 100 cigs         | 2,800                          | 0.64 | 1.6E-07 | -0.38             | 1.0E-04 | -0.08             | 2.0E-03 |
| daily smoking $\geq$ one month | 2,597                          | 0.64 | 3.8E-07 | -0.37             | 3.5E-04 | -0.08             | 4.3E-04 |

**Supplementary Table 2:** Association between rs1451240 and smoking phenotypes.

|                                | n     | OR/ $\beta$ | p       |
|--------------------------------|-------|-------------|---------|
| FTCD $\leq$ 3 vs FTCD $\geq$ 4 | 3,359 | 0.65        | 2.1E-08 |
| FTCD $\leq$ 1 vs FTCD $\geq$ 4 | 3,058 | 0.64        | 4.0E-07 |
| CPD $\leq$ 10 vs CPD $>$ 20    | 2,572 | 0.69        | 2.0E-04 |
| Time to first Cigarette        | 3,359 | -0.23       | 2.8E-02 |
| FTCD residual from CPD         | 3,359 | -0.19       | 1.0E-01 |

**Supplementary Table 3:** Characteristic of sample, by contributing study.

|                           | Nicotine Dependent Smokers |       |       | Controls |       |       |
|---------------------------|----------------------------|-------|-------|----------|-------|-------|
|                           | COGEND                     | COGA  | FSCD  | COGEND   | COGA  | FSCD  |
|                           | n=275                      | n=649 | n=370 | n=1,082  | n=553 | n=436 |
| no comorbid diagnosis     | 94%                        | 12%   | 4%    | 83%      | 52%   | 63%   |
| alcohol dependence        | 5%                         | 88%   | 96%   | 17%      | 48%   | 37%   |
| cocaine dependence        | 24%                        | 42%   | 14%   | 14%      | 19%   | 25%   |
| <u>cigarettes per day</u> | -                          |       |       | -        |       |       |
| 0-10                      | 8%                         | 14%   | 8%    | 93%      | 84%   | 86%   |
| 11-20                     | 37%                        | 46%   | 46%   | 7%       | 16%   | 12%   |
| 21-30                     | 23%                        | 20%   | 15%   | 0%       | 1%    | 1%    |
| ≥ 31                      | 31%                        | 20%   | 31%   | 0%       | 0%    | 0%    |
| <u>Age</u>                |                            |       |       |          |       |       |
| < 35                      | 27%                        | 19%   | 34%   | 36%      | 19%   | 36%   |
| 35-39                     | 30%                        | 22%   | 25%   | 27%      | 21%   | 20%   |
| 40-44                     | 41%                        | 22%   | 24%   | 34%      | 18%   | 22%   |
| ≥ 45                      | 2%                         | 37%   | 18%   | 4%       | 42%   | 22%   |
| male                      | 54%                        | 62%   | 54%   | 30%      | 50%   | 47%   |
| female                    | 45%                        | 38%   | 46%   | 70%      | 50%   | 53%   |
| Income < \$20,000         | 7%                         | 18%   | 36%   | 2%       | 9%    | 14%   |
| No High School Degree     | 15%                        | 22%   | 30%   | 2%       | 9%    | 8%    |
